# Supplementary material for: p120 Catenin-Mediated Stabilization of E-Cadherin Is Essential for Primitive Endoderm Specification
Source: PubMed Central journal article supplement (PMC4996431; doi:10.1371/journal.pgen.1006243), 2016-08-24

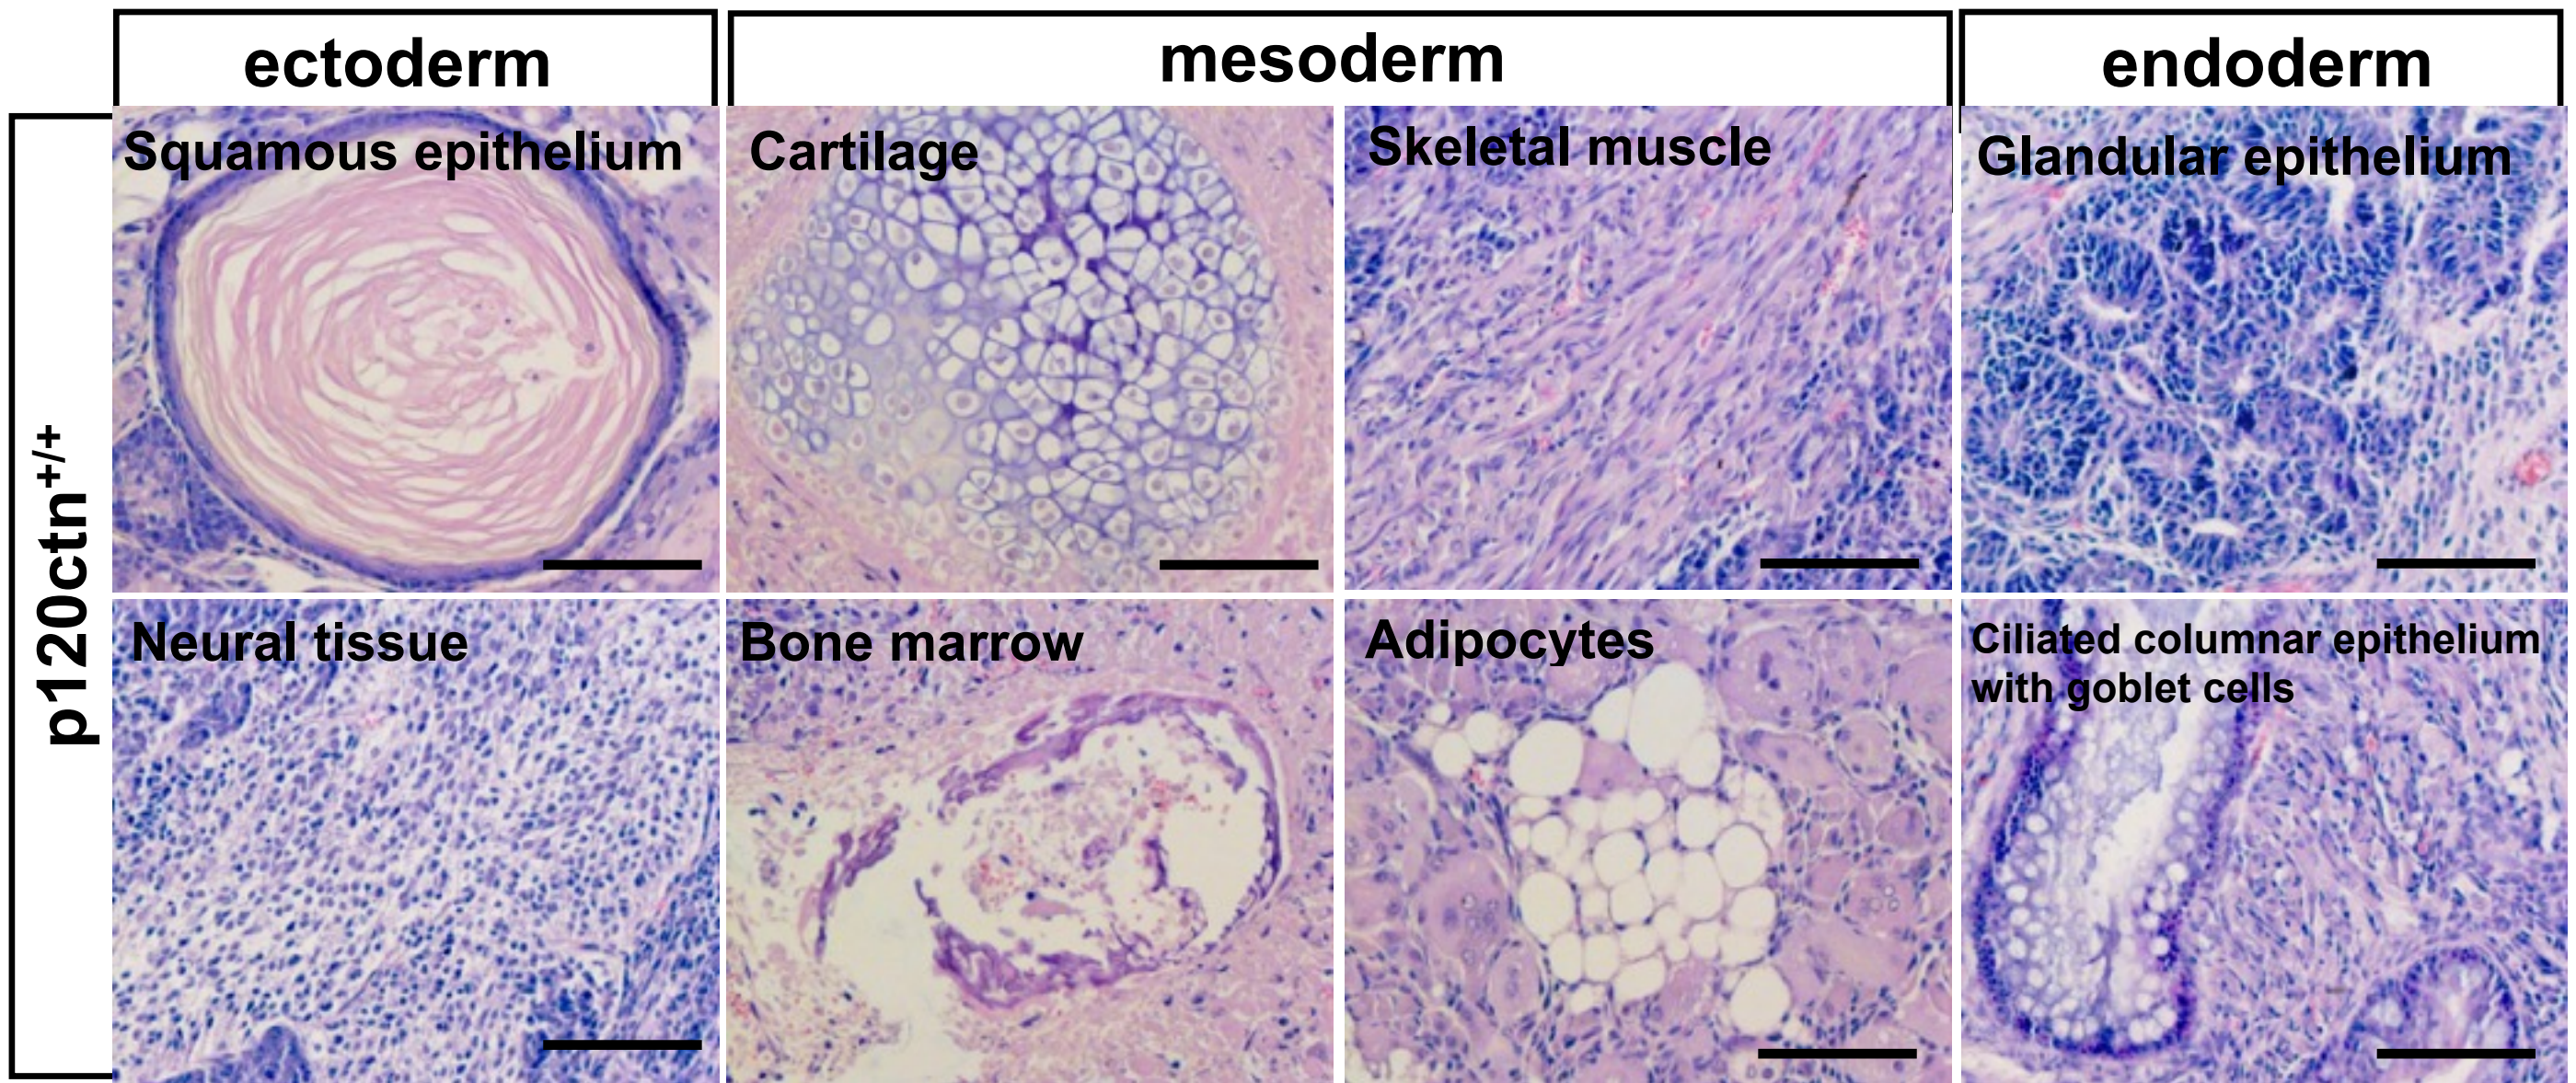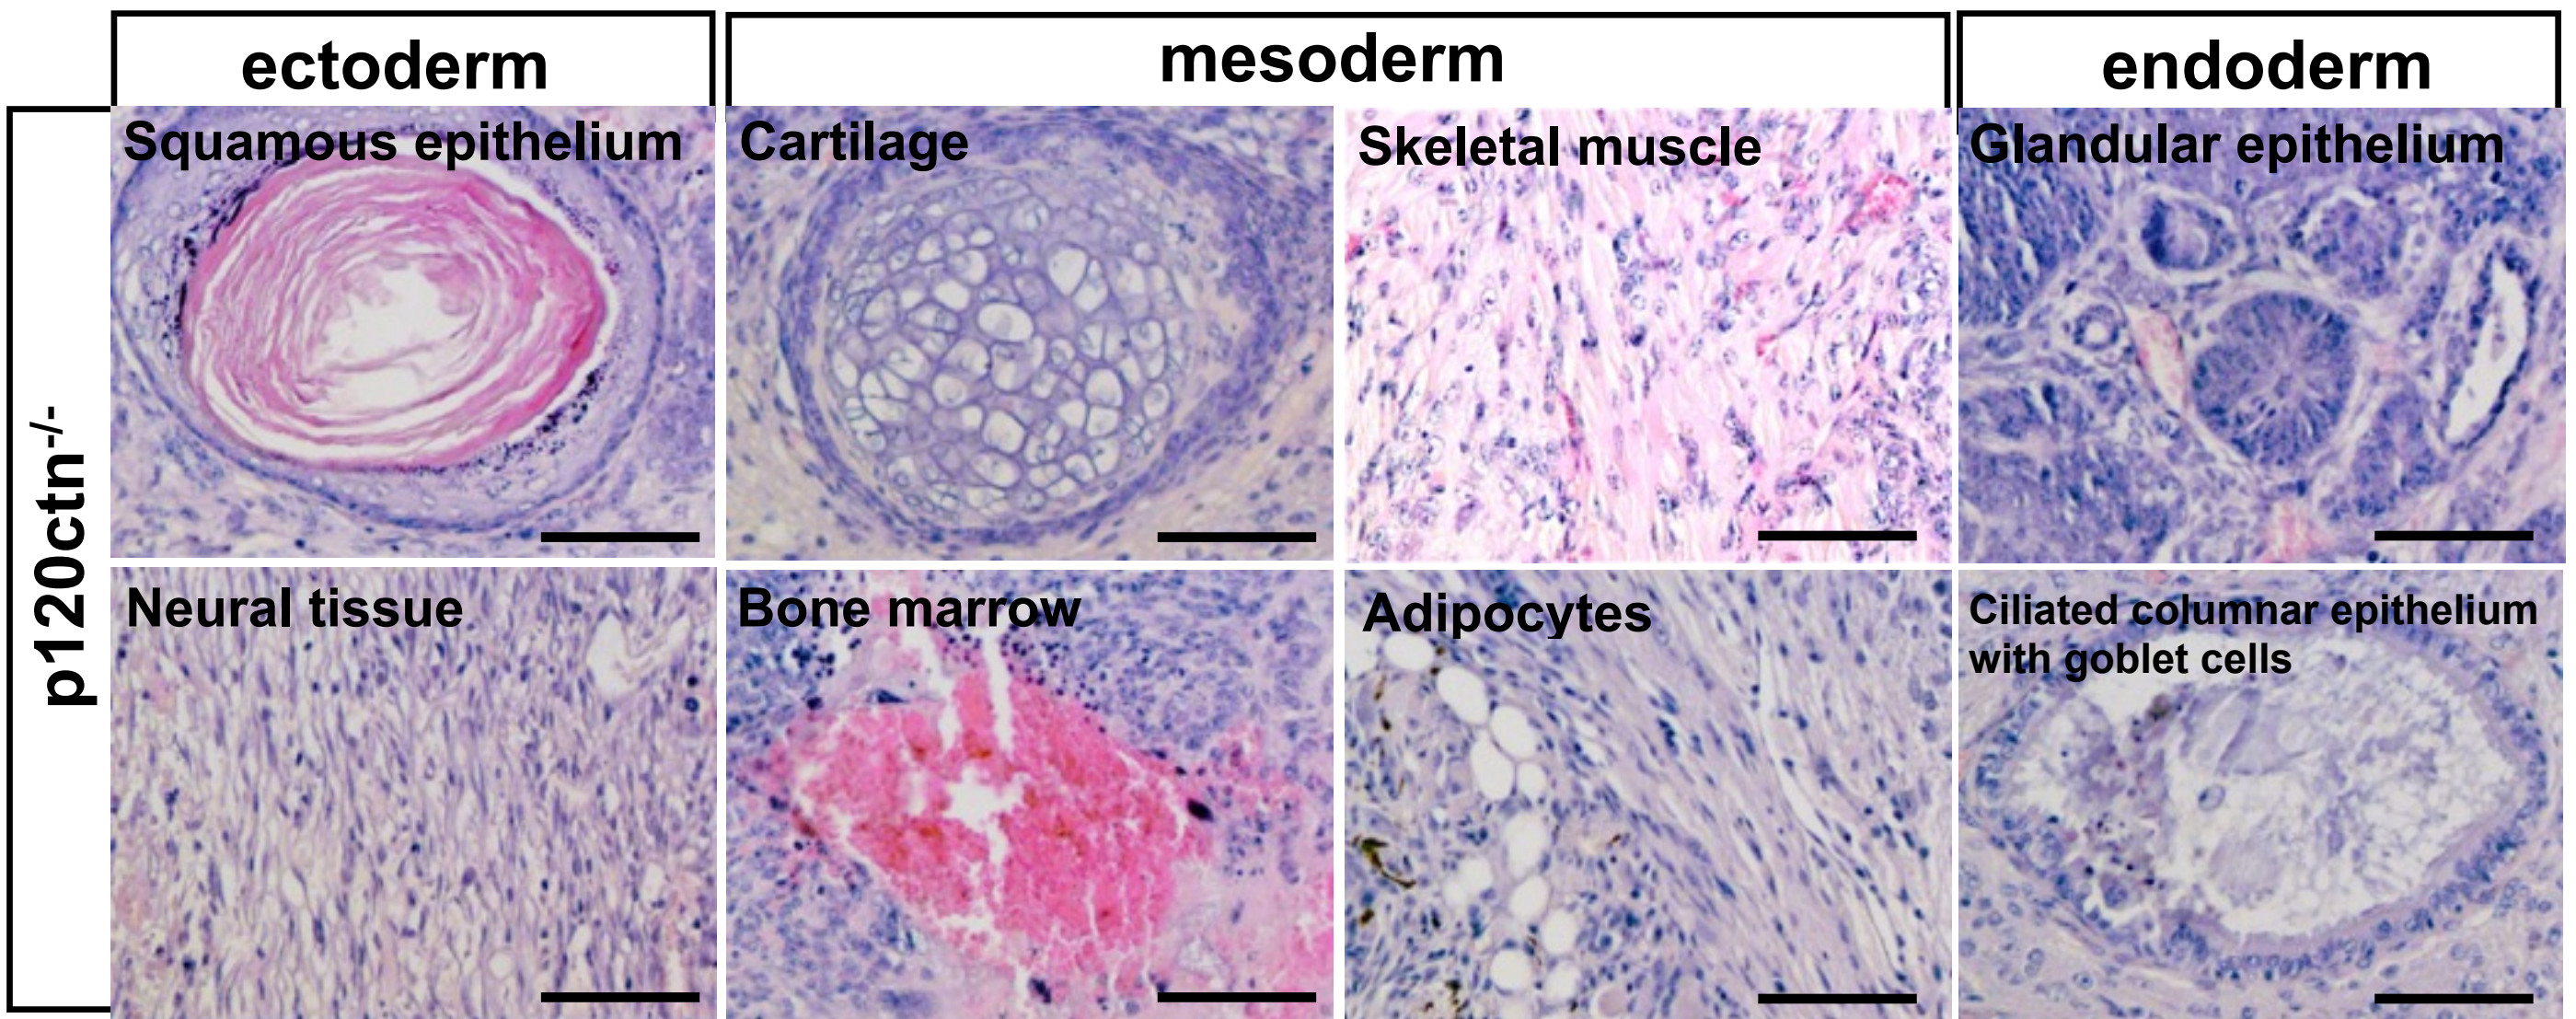

Supplement: pgen.1006243.s003.pdf [file pgen.1006243.s003.pdf]
